# Supplementary material for: Length of stay to recover from severe acute malnutrition and associated factors among under-five years children admitted to public hospitals in Aksum, Ethiopia
Source: PubMed Central journal article supplement (PMC7523984; doi:10.1371/journal.pone.0238311), 2020-09-29
Supplement: pone.0238311.s002.pdf [file pone.0238311.s002.pdf]

# PLOS ONE

## Length of stay to recover from severe acute malnutrition and associated factors among under-five years children admitted to public Hospitals in Aksum, Ethiopia --Manuscript Draft--

|                                |                                                                                                                                                                                                                                                                                                                                                                                                                                                                                                                                                                                                                                                                                                                                                                                                                                                                                                                                                                                                                                                                                                                                                                                                                                                                                                                                                                                                                                                                                                                                                                                                                                                                                                                                                                                                                                                                                                                                                                                                                                                                                                                                                                                                                                                                                                                                                                                                                                                                                                                                                                                                                                                                   |
|--------------------------------|-------------------------------------------------------------------------------------------------------------------------------------------------------------------------------------------------------------------------------------------------------------------------------------------------------------------------------------------------------------------------------------------------------------------------------------------------------------------------------------------------------------------------------------------------------------------------------------------------------------------------------------------------------------------------------------------------------------------------------------------------------------------------------------------------------------------------------------------------------------------------------------------------------------------------------------------------------------------------------------------------------------------------------------------------------------------------------------------------------------------------------------------------------------------------------------------------------------------------------------------------------------------------------------------------------------------------------------------------------------------------------------------------------------------------------------------------------------------------------------------------------------------------------------------------------------------------------------------------------------------------------------------------------------------------------------------------------------------------------------------------------------------------------------------------------------------------------------------------------------------------------------------------------------------------------------------------------------------------------------------------------------------------------------------------------------------------------------------------------------------------------------------------------------------------------------------------------------------------------------------------------------------------------------------------------------------------------------------------------------------------------------------------------------------------------------------------------------------------------------------------------------------------------------------------------------------------------------------------------------------------------------------------------------------|
| <b>Manuscript Number:</b>      | PONE-D-20-03753                                                                                                                                                                                                                                                                                                                                                                                                                                                                                                                                                                                                                                                                                                                                                                                                                                                                                                                                                                                                                                                                                                                                                                                                                                                                                                                                                                                                                                                                                                                                                                                                                                                                                                                                                                                                                                                                                                                                                                                                                                                                                                                                                                                                                                                                                                                                                                                                                                                                                                                                                                                                                                                   |
| <b>Article Type:</b>           | Research Article                                                                                                                                                                                                                                                                                                                                                                                                                                                                                                                                                                                                                                                                                                                                                                                                                                                                                                                                                                                                                                                                                                                                                                                                                                                                                                                                                                                                                                                                                                                                                                                                                                                                                                                                                                                                                                                                                                                                                                                                                                                                                                                                                                                                                                                                                                                                                                                                                                                                                                                                                                                                                                                  |
| <b>Full Title:</b>             | Length of stay to recover from severe acute malnutrition and associated factors among under-five years children admitted to public Hospitals in Aksum, Ethiopia                                                                                                                                                                                                                                                                                                                                                                                                                                                                                                                                                                                                                                                                                                                                                                                                                                                                                                                                                                                                                                                                                                                                                                                                                                                                                                                                                                                                                                                                                                                                                                                                                                                                                                                                                                                                                                                                                                                                                                                                                                                                                                                                                                                                                                                                                                                                                                                                                                                                                                   |
| <b>Short Title:</b>            | Length of stay to recover from severe acute malnutrition and associated factors among under-5 years children                                                                                                                                                                                                                                                                                                                                                                                                                                                                                                                                                                                                                                                                                                                                                                                                                                                                                                                                                                                                                                                                                                                                                                                                                                                                                                                                                                                                                                                                                                                                                                                                                                                                                                                                                                                                                                                                                                                                                                                                                                                                                                                                                                                                                                                                                                                                                                                                                                                                                                                                                      |
| <b>Corresponding Author:</b>   | Tekia Zafu<br>Aksum University<br>Axum, Tigray ETHIOPIA                                                                                                                                                                                                                                                                                                                                                                                                                                                                                                                                                                                                                                                                                                                                                                                                                                                                                                                                                                                                                                                                                                                                                                                                                                                                                                                                                                                                                                                                                                                                                                                                                                                                                                                                                                                                                                                                                                                                                                                                                                                                                                                                                                                                                                                                                                                                                                                                                                                                                                                                                                                                           |
| <b>Keywords:</b>               | length of stay, severe acute malnutrition, children, hospital, Aksum                                                                                                                                                                                                                                                                                                                                                                                                                                                                                                                                                                                                                                                                                                                                                                                                                                                                                                                                                                                                                                                                                                                                                                                                                                                                                                                                                                                                                                                                                                                                                                                                                                                                                                                                                                                                                                                                                                                                                                                                                                                                                                                                                                                                                                                                                                                                                                                                                                                                                                                                                                                              |
| <b>Abstract:</b>               | <p>Background: Severe acute malnutrition is defined by &lt;70% weight for length/height, by visible severe wasting, by the presence of pitting edema, and in children 6 to 59 months of age, mid upper arm circumference &lt;110 mm (1–3). Severe acute malnutrition remains to be a worldwide problem, claiming lives of millions, especially in sub-Saharan Africa and south Asia. Though the Ethiopian guideline states the total length of stay in therapeutic feeding units should be less than four weeks, there is huge difference, varying from 8 to 47 days of stay. The objective of this study was to assess length of stay to recover from severe acute malnutrition and associated factors among under five children hospitalized to the public hospitals in Aksum from September 11, 2016 to February 10, 2019.</p> <p>Methods: Sample size was calculated using STATA version 12.0 and retrospective cohort study was conducted using pretested questionnaire in the public hospitals in Aksum on children aged 0-59 months. Cleaned data was entered to Epi info version 7.1.4 and then exported into SPSS version 21 for analysis. Bivariate and multivariate analysis was performed using Kaplan Meier and Cox regression model. In multivariate analysis, those with p-value &lt; 0.05 were selected for multivariable analysis using Cox regression model to identify factors associated with length of stay.</p> <p>Results: A total of 564 participants were enrolled to the study. The rate of recovery was 56% with median length of stay of 15 days (95% CI: 14.1, 15.9). The independent predictors of length of stay till recovery were presenting with diarrhea (AHR=0.573, 95% CI: 0.415-0.793), reactive HIV test (AHR=0.391, 95% CI: 0.194-0.788), palmar pallor (AHR=0.575, 95% CI: 0.416-0.794), co-morbidity (AHR=0.415, 95% CI: 0.302-0.570) at admission and not being treated with plumpy nut (AHR=0.368, 95% CI: 0.262-0.518), not blood transfused (AHR=1.905, 95% CI: 1.158-3.135), no IV fluid resuscitation (AHR=1.548, 95% CI: 1.074-2.232) and not fed with NG tube (AHR=1.861, 95% CI: 1.335-2.593).</p> <p>Conclusions: Length of stay is in the acceptable range of the international and national set of standards. Nevertheless, the cure rate was lower compared to the Sphere standards. Presence of co-morbidity, diarrhea, pallor and HIV, and not receiving plumpy nut should be prevented while not being transfused, not being infused and not fed with naso-gastric tube were protective for early recovery.</p> <p>Key words: length of stay, severe acute malnutrition, children, hospital, Aksum.</p> |
| <b>Order of Authors:</b>       | Wagnew Tesfay<br>Tekia Zafu<br>Mebrahtu Abay<br>Solomon Hintsu                                                                                                                                                                                                                                                                                                                                                                                                                                                                                                                                                                                                                                                                                                                                                                                                                                                                                                                                                                                                                                                                                                                                                                                                                                                                                                                                                                                                                                                                                                                                                                                                                                                                                                                                                                                                                                                                                                                                                                                                                                                                                                                                                                                                                                                                                                                                                                                                                                                                                                                                                                                                    |
| <b>Additional Information:</b> |                                                                                                                                                                                                                                                                                                                                                                                                                                                                                                                                                                                                                                                                                                                                                                                                                                                                                                                                                                                                                                                                                                                                                                                                                                                                                                                                                                                                                                                                                                                                                                                                                                                                                                                                                                                                                                                                                                                                                                                                                                                                                                                                                                                                                                                                                                                                                                                                                                                                                                                                                                                                                                                                   |
| <b>Question</b>                | <b>Response</b>                                                                                                                                                                                                                                                                                                                                                                                                                                                                                                                                                                                                                                                                                                                                                                                                                                                                                                                                                                                                                                                                                                                                                                                                                                                                                                                                                                                                                                                                                                                                                                                                                                                                                                                                                                                                                                                                                                                                                                                                                                                                                                                                                                                                                                                                                                                                                                                                                                                                                                                                                                                                                                                   |
| <b>Financial Disclosure</b>    | The authors received no specific funding for this work                                                                                                                                                                                                                                                                                                                                                                                                                                                                                                                                                                                                                                                                                                                                                                                                                                                                                                                                                                                                                                                                                                                                                                                                                                                                                                                                                                                                                                                                                                                                                                                                                                                                                                                                                                                                                                                                                                                                                                                                                                                                                                                                                                                                                                                                                                                                                                                                                                                                                                                                                                                                            |

were

this is not necessary to mention here. push it to methodology

presentation

Enter a financial disclosure statement that describes the sources of funding for the work included in this submission. Review the [submission guidelines](#) for detailed requirements. View published research articles from [PLOS ONE](#) for specific examples.

This statement is required for submission and **will appear in the published article** if the submission is accepted. Please make sure it is accurate.

#### Unfunded studies

Enter: *The author(s) received no specific funding for this work.*

#### Funded studies

Enter a statement with the following details:

- Initials of the authors who received each award
- Grant numbers awarded to each author
- The full name of each funder
- URL of each funder website
- Did the sponsors or funders play any role in the study design, data collection and analysis, decision to publish, or preparation of the manuscript?
- **NO** - Include this sentence at the end of your statement: *The funders had no role in study design, data collection and analysis, decision to publish, or preparation of the manuscript.*
- **YES** - Specify the role(s) played.

\* typeset

#### Competing Interests

Use the instructions below to enter a competing interest statement for this submission. On behalf of all authors, disclose any [competing interests](#) that could be perceived to bias this work—acknowledging all financial support and any other relevant financial or non-financial competing interests.

This statement **will appear in the published article** if the submission is accepted. Please make sure it is accurate. View published research articles

The authors have declared that no competing interests exist.

from [PLOS ONE](#) for specific examples.

**NO authors have competing interests**

Enter: *The authors have declared that no competing interests exist.*

**Authors with competing interests**

Enter competing interest details beginning with this statement:

*I have read the journal's policy and the authors of this manuscript have the following competing interests: [insert competing interests here]*

\* typeset

**Ethics Statement**

Enter an ethics statement for this submission. This statement is required if the study involved:

- Human participants
- Human specimens or tissue
- Vertebrate animals or cephalopods
- Vertebrate embryos or tissues
- Field research

Write "N/A" if the submission does not require an ethics statement.

General guidance is provided below. Consult the [submission guidelines](#) for detailed instructions. **Make sure that all information entered here is included in the Methods section of the manuscript.**

Ethical clearance and permission letter were taken from the Ethical Review Committee (ERC) of Aksum University, College of health science. An official letter was written to Selekleka primary hospital requesting facilitation to conduct the research study and this official letter approved and distributed to the respective units of Selekleka primary hospital. Confidentiality and privacy was maintained during data collection, analysis and reporting in which the information obtained from the data will not be shared other than the data collectors and principal investigator and this was assured by obtaining institutional written consent from Selekleka primary hospital and by providing Information sheet which explains the purpose, benefit, and short and long-term effect of the study on the study participants.

**Format for specific study types**

**Human Subject Research (involving human participants and/or tissue)**

- Give the name of the institutional review board or ethics committee that approved the study
- Include the approval number and/or a statement indicating approval of this research
- Indicate the form of consent obtained (written/oral) or the reason that consent was not obtained (e.g. the data were analyzed anonymously)

**Animal Research (involving vertebrate animals, embryos or tissues)**

- Provide the name of the Institutional Animal Care and Use Committee (IACUC) or other relevant ethics board that reviewed the study protocol, and indicate whether they approved this research or granted a formal waiver of ethical approval
- Include an approval number if one was obtained
- If the study involved *non-human primates*, add *additional details* about animal welfare and steps taken to ameliorate suffering
- If anesthesia, euthanasia, or any kind of animal sacrifice is part of the study, include briefly which substances and/or methods were applied

**Field Research**

Include the following details if this study involves the collection of plant, animal, or other materials from a natural setting:

- Field permit number
- Name of the institution or relevant body that granted permission

**Data Availability**

Authors are required to make all data underlying the findings described fully available, without restriction, and from the time of publication. PLOS allows rare exceptions to address legal and ethical concerns. See the [PLOS Data Policy](#) and [FAQ](#) for detailed information.

Yes - all data are fully available without restriction

A Data Availability Statement describing where the data can be found is required at submission. Your answers to this question constitute the Data Availability Statement and **will be published in the article**, if accepted.

**Important:** Stating 'data available on request from the author' is not sufficient. If your data are only available upon request, select 'No' for the first question and explain your exceptional situation in the text box.

Do the authors confirm that all data underlying the findings described in their manuscript are fully available without restriction?

**Describe where the data may be found in full sentences. If you are copying our sample text, replace any instances of XXX with the appropriate details.**

- If the data are **held or will be held in a public repository**, include URLs, accession numbers or DOIs. If this information will only be available after acceptance, indicate this by ticking the box below. For example: *All XXX files are available from the XXX database (accession number(s) XXX, XXX).*
- If the data are all contained **within the manuscript and/or Supporting Information files**, enter the following: *All relevant data are within the manuscript and its Supporting Information files.*
- If neither of these applies but you are able to provide **details of access elsewhere**, with or without limitations, please do so. For example:

*Data cannot be shared publicly because of [XXX]. Data are available from the XXX Institutional Data Access / Ethics Committee (contact via XXX) for researchers who meet the criteria for access to confidential data.*

*The data underlying the results presented in the study are available from (include the name of the third party*

All relevant data will present up on request.

*and contact information or URL).*

- This text is appropriate if the data are owned by a third party and authors do not have permission to share the data.

\* typeset

Additional data availability information:

1 **Length of stay to recover from severe acute malnutrition and**  
2 **associated factors among under-five years children admitted to**  
3 **public Hospitals in Aksum, Ethiopia**

4 **Wagnew Tesfay<sup>1</sup>, Mebrahtu Abay<sup>2</sup>, Solomon Hintsa<sup>3</sup>, Tekia Zafu<sup>4\*</sup>**

5 <sup>1</sup>Medecins Sans Frontieres Holland, Ethiopia mission, Tigray project, Email:  
6 [wagnew.tesfaye@gmail.com](mailto:wagnew.tesfaye@gmail.com)

7 <sup>2</sup>Department of Epidemiology and Biostatistics, School of Public Health, College of Health  
8 Science, Aksum University, Aksum, Ethiopia, Email: [gmebrahtuabay@gmail.com](mailto:gmebrahtuabay@gmail.com)

9 <sup>3</sup>Department of Epidemiology and Biostatistics, School of Public Health, College of Health  
10 Science, Aksum University, Aksum, Ethiopia, Email: [solomonhintsa2013@gmail.com](mailto:solomonhintsa2013@gmail.com)

11 <sup>1</sup>Department of Epidemiology and Biostatistics, School of Public Health, College of Health  
12 Science, Aksum University, Aksum, Ethiopia, Email: [tekish2014@gmail.com](mailto:tekish2014@gmail.com)

13 **\*Corresponding author:** Email: [tekish2014@gmail.com](mailto:tekish2014@gmail.com), Tel: +251920256201

## 14 **Abstract**

15 **Background:** Severe acute malnutrition is defined by <70% weight for length/height, by  
16 visible severe wasting, by the presence of pitting edema, and in children 6 to 59 months of  
17 age, mid upper arm circumference <110 mm (1–3). Severe acute malnutrition remains to be  
18 a worldwide problem, claiming lives of millions of children, especially in sub-Saharan Africa  
19 and south Asia. Though the Ethiopian national guideline states the total length of stay in  
20 therapeutic feeding units should not be more than four weeks, there is huge difference,  
21 varying from 8 to 47 days of stay. So objective of this study was to assess length of stay to  
22 recover from severe acute malnutrition and associated factors among under five children  
23 hospitalized to the public hospitals in Aksum from September 11, 2016 to February 10, 2019.

24 **Methods:** Sample size was calculated using STATA version 12.0 and retrospective cohort  
25 study was conducted using pretested questionnaire in the public hospitals in Aksum on  
26 children aged 0-59 months. Cleaned data was entered to Epi info version 7.1.4 and then  
27 exported into SPSS version 21 for analysis. Bivariate and multivariate analysis was  
28 performed using Kaplan Meier and Cox regression. During bivariate analysis, those with p-  
29 value < 0.05 were selected for multivariable analysis using Cox regression model to identify  
30 factors associated with length of stay.

31 **Results:** A total of 564 participants were enrolled to the study. The rate of recovery was 56%  
32 with median length of stay of 15 days (95% CI: 14.1, 15.9). The independent predictors of  
33 length of stay till recovery were presenting with diarrhea (AHR=0.573, 95% CI: 0.415-  
34 0.793), reactive HIV test (AHR=0.391, 95% CI: 0.194-0.788), palmar pallor (AHR=0.575,  
35 95% CI: 0.416-0.794), co-morbidity (AHR=0.415, 95% CI: 0.302-0.570) at admission and



36 not being treated with plumpy nut (AHR=0.368, 95% CI: 0.262-0.518), not blood transfused  
37 (AHR=1.905, 95% CI: 1.158-3.135), no IV fluid resuscitation (AHR=1.548, 95% CI: 1.074-  
38 2.232) and not fed with NG tube (AHR=1.861, 95% CI: 1.335-2.593).

39 **Conclusions:** Length of stay is in the acceptable range of the international and national set of  
40 standards. Nevertheless, the cure rate was lower compared to the Sphere standards. Presence  
41 of co-morbidity, diarrhea, pallor and HIV, and not receiving plumpy nut should be prevented  
42 while not being transfused, not being infused and not fed with naso-gastric tube were  
43 protective for early recovery.

44 **Key words:** length of stay, severe acute malnutrition, children, hospital, Aksum.

## 45 **Introduction**

46 Severe acute malnutrition (SAM) is defined by <70% weight for length/height (WFL/H), by  
47 visible severe wasting, by the presence of pitting edema, and in children 6 to 59 months of  
48 age, mid upper arm circumference (MUAC) <110 mm (1–3). Although there are basic and  
49 underlying causes, SAM is the immediate effect of inadequate dietary intake (quality or  
50 quantity) &/or infections like tuberculosis (TB), human immune deficiency virus/acquired  
51 immune deficiency syndrome (HIV/AIDS) and diarrhea that often lead to nutrient mal-  
52 absorptions (4).

53 Although SAM usually affects all segments of a population, infants and young children are  
54 most vulnerable as they have higher nutritional requirements for growth and development  
55 (5). It is one of the leading causes of morbidity and mortality among infants and young  
56 children all over the world and more frequently in sub-Saharan Africa and south Asia (6).The  
57 peak age for SAM is 6-18 months, time of especially high growth velocity and brain

58 development. However, it is increasingly becoming common that SAM may occur in infants  
59 less than six months of age with many disadvantaged populations introducing solids to  
60 children as young as two months (3).

61 The 2013 Ethiopian guideline for SAM management states that the total length of stay (LOS)  
62 in therapeutic feeding units (TFUs) should not be more than four weeks (7). But there is huge  
63 difference in LOS in studies done in Ethiopia, varying from 8 to 47 days (8–10).

64 Severe acute malnutrition is a worldwide problem and one of the top deadly diseases for  
65 children less than five years of age. Severely malnourished children have a nine times more  
66 mortality rates than well-nourished children (11). As United nations' international children's  
67 emergency fund/world health organization/World bank stated in their joint report in 2018  
68 (12), wasting threatened lives of an estimated 50.5 million children under five globally, of  
69 which 13.8 million are from Africa. Also there are 52 million (close to 8.3 per cent) children  
70 less than five suffering from acute malnutrition; out of those affected more than 90 per cent  
71 are from South & Southeast Asia & sub-Saharan Africa (13).

72 More than ten million children die before celebrating their fifth birthday each year globally  
73 due to SAM. Huge number of severely malnourished children die at their home without any  
74 hospital care, but sometimes even hospital care is given, death rates may be high (7). In  
75 developing countries, children under five who are severely malnourished and admitted to  
76 hospital face a 30 to 50 per cent case fatality rate, which is unacceptably high (14).

77 In the developing world, where SAM is the most common reason for pediatric  
78 hospitalization, it is associated with higher risk of morbidity & mortality, underlying for  
79 more than 50 per cent of the ten to eleven million children under 5 years old who die every

80 year from avoidable causes (2,15,16). Despite of such worldwide significance, child recovery  
81 programs have not given the required attention for facility based management of SAM (2).

82 According to studies from Kenya and Niger, recovery rate and LOS are affected by co-  
83 morbidities like pneumonia, malaria, altered consciousness, weak pulse, inability to drink,  
84 temperature gradient, chest in-drawing, diarrhea & severe pallor (17,18).

85 Horn of Africa has identified 6.6 per cent of children less than five years old as wasted. With  
86 estimated 10%, Ethiopia has highest rate of wasting (acute malnutrition) in this region (19).  
87 Even though it was not well known in this particular study area, some studies in Ethiopia  
88 indicated that there is a big variation in LOS in Ethiopia, ranging from 8 to 47 days (8–10),  
89 that is not congruent with the National SAM management protocol that states the total LOS  
90 in TFUs should not be more than four weeks (7). A study in northwest Ethiopia also revealed  
91 that patients admitted with SAM had a case fatality and defaulter rates of 18%, and 9%  
92 respectively (20).

93 UNICEF has conducted an evaluation study in Ethiopia (21) and identified gaps and  
94 management errors in the services like not giving routine medicines such as Amoxicillin,  
95 children who should be managed in phase two were managed in phase one, and those who  
96 could be treated in OTP were being treated in TFU, poor medical record handling, late  
97 transfer of cases from phase to phase & to discharge, and limited area allowed to the TFU  
98 that increase cross infection and raised risk of death, especially for HIV infected children as.

99 Though the Federal Ministry of Health (FMoH) jointly with its partners is taking promising  
100 actions in reducing SAM, the Ethiopian national underweight and wasting rates among under

101 five children are still high, 24 and 10 % respectively. The same is true in Tigray region as the  
102 underweight & wasting rates are 23 and 11% respectively (22,23).

103 There were couples of researches conducted on malnutrition in the study area, but none of  
104 them attempted to assess the length of stay to recover from SAM and associated factors  
105 among under five children hospitalized to public hospitals in Aksum town, northern Ethiopia.  
106 So, this research was intended to come up with information about length of stay till recovery  
107 and associated factors among severely malnourished children admitted to the identified  
108 health facilities for the betterment of quality of care.

109 Using the effective treatment protocols available for proper treatment of SAM plays a crucial  
110 role in achieving global child health targets. Though community based management of acute  
111 malnutrition (CMAM) is being advocated since recent years (7), health institution based  
112 treatment of SAM is still needed and particularly total length of stay until children admitted  
113 with SAM get recovered demands attention.

114 The purpose of this study was to assess the length of stay to recover from SAM and  
115 associated factors among under five children admitted to the public hospitals in Aksum,  
116 northern Ethiopia. Although there are couples of researches done on malnutrition in the  
117 mentioned study area, the proposed title and design was not addressed.

118 Moreover, coming up with recent information about length of stay till recovery and  
119 associated factors among severely malnourished children is enormously relevant to be used  
120 as input by clinicians for betterment of quality of care given to clients and as a guide  
121 (reference) for academicians who are interested to conduct further related research on the  
122 area. Therefore, the objective of this study was to assess length of stay to recover from SAM

Do not repeat the objective

123 and associated factors among children aged 0-59 months admitted to the public hospitals in  
124 Aksum town from September 11, 2016 to February 10, 2019, central zone of Tigray regional  
125 state, northern Ethiopia; 2019.

## 126 **Methods and materials**

### 127 **Study area and period**

128 Aksum is found in Tigray regional state, 1042 km far from the capital city of Ethiopia, Addis  
129 Ababa. St. Mary general hospital and Aksum University comprehensive specialized hospital  
130 are providing inpatient and outpatient services for approximately 2.8 million catchment  
131 population. Medical and health officer (HO) interns, nurses, general practitioners (GPs) and a  
132 pediatrician in each hospital are providing medical care and treatment for SAM children  
133 admitted to both health institutions. Admission, management and discharge procedures for  
134 SAM are compatible with the Protocol developed by Federal Ministry of Health (FMoH),  
135 that is updated in 2013 (7).

136 The study was carried out on those admitted with SAM from September 11, 2016 to February  
137 10, 2019. Data was abstracted within 15 days (from March 6-20, 2019).

### 138 **Study design**

139 Health facility based retrospective cohort study was conducted in the two public hospitals  
140 (St. Mary and Aksum University comprehensive specialized hospital).

141 **Source and study population**

142 The source populations were all severely malnourished children admitted to TFUs of the  
143 public hospitals in Aksum. And the study populations were all severely malnourished  
144 children admitted to TFUs of the public hospitals in Aksum from September 11, 2016 to  
145 February 10, 2019.

146 **Inclusion and exclusion criteria**

147 **Inclusion criteria**

148 All severely malnourished under five children admitted to TFUs of the stated hospitals from  
149 September 11, 2016 to February 10, 2019, fulfilling the admission criteria set by FMOH  
150 guideline. Admission criteria, according to the National protocol for SAM management (7),  
151 are as follows;

152 Infants < 6 months or <3kg can be admitted to the NRUs when they have WFL <70% of  
153 median, presence of bilateral pitting edema, or visible severe wasting. Children aged 6-59  
154 months can be admitted if they come up with WFL/WFH <70% of median, bilateral pitting  
155 edema, or MUAC <11Cm.

156 **Exclusion criteria**

157 This study has excluded children whose admission and discharge date not recorded as this  
158 will not show the outcome variable (LOS), those with congenital anomalies like cleft lip and  
159 developmental disorders such as Down's syndrome as these can be a confounding with LOS  
160 for SAM and those whose medical records were not found or incomplete for type of SAM.

161 **Sample size and sampling procedure**

162 Sample size was calculated based on sample size estimation for survival under the Cox  
163 proportional hazards model using the STATA Version 12.0, taking the following  
164 assumptions into account: a 1.8 adjusted hazard ratio, 17.1% (0.171) observed prevalence of  
165 failure/non-recovery (35), with marginal error of 5% and confidence interval of 95%. With  
166 the assumption of number of study subjects required to achieve a study power of 80% and  
167 10% incompleteness, the overall sample become 585 (**Table 1**).

168 **Study participants**

169 All selected children aged 0-59 months with severe acute malnutrition admitted to NRUs of  
170 St. Mary general and Aksum University comprehensive specialized hospitals from  
171 September 11, 2016 to February 10, 2019 with clear inclusion and exclusion criteria.

172 The actual number of under five children admitted with SAM to the stated hospitals in the  
173 study period was estimated to be 700 (280 from Aksum University comprehensive  
174 specialized hospital and 420 from St. Mary hospital). Systematic random sampling technique  
175 was used to select the 585 study participants from the actual 700 taking each participant  
176 consecutively ( $700/585 = 1.2$ ). With this proportion, 234 participants were selected  
177 consecutively from Aksum University comprehensive specialized hospital (AkUCSH) and  
178 351 from St. Mary General hospital. Out of these eligible study participants, 564 of them  
179 were enrolled into the study whereas the remaining 21 (3.6%) children were excluded.  
180 Among these excluded, the clinical files for 12 children from St. Mary hospital were not  
181 found and one participant was removed during analysis as it was influential extreme value  
182 from same institution whereas total of eight children from AkUCSH were excluded (four

183 were admitted with congenital anomalies and developmental disorders (one with cleft lip and  
184 three with Down's syndrome) and clinical files were incomplete for type of SAM for the  
185 remaining four).

## 186 **Variables of the study**

### 187 **Dependent/outcome variable:**

188 Time till recovery (LOS)

189 Event: recovery

190 Censored: Not recovered from SAM. (Death, defaulter, medical referral, transferred)

### 191 **Independent variables:**

192 • Main exposure variable:

193 Severe acute malnutrition diagnosis (marasmus, kwashiorkor marasmic-kwashiorkor)

194 ○ Exposed: those with edematous type of SAM (kwashiorkor/marasmic-kwash)

195 ○ Non-exposed: those with non-edematous type of SAM (marasmus)

196 • Other independent variables

197 ○ Study subject characteristics (age, sex, residence)

198 ○ Routine medications, supplements and therapeutic feedings

199 ○ Co-morbidities (like HIV, malaria, TB, severe anemia)

## 200 **Operational definitions**

201 Length of stay (LOS): refers to the number of days/weeks it takes from hospitalization till

202 when a child recovered from SAM of any kind. Children are called recovered when they got



203 relieved from medical complications, edema and have gained and maintained WFL/WFH of  
204 85% (7).

205 Defaulters: those who were not found in the NRU for two successive days, or who leave the  
206 ward against professional advice while the child is not cured (7,13,32).

207 Death: when the SAM child die while receiving treatment in the TFU and registered as dead  
208 in the treatment logbook (7).

## 209 **Data collection tools and data quality control**

### 210 **Data collection tools**

211 A compilation sheet (coding check list) was developed relating to the FMOH standard  
212 management protocol for SAM. Then needed individual data was extracted from relevant  
213 documents like SAM registration logbook, SAM monitoring multi-chart and patient clinical  
214 files.

### 215 **Data quality control**

216 Compilation sheet (check list) was prepared in English that was pre-tested in Sehul general  
217 hospital in Shire using 5% of the total sample (29 participants) and revised for sequence and  
218 layout. Four Bachelor of Science degree holder health care professionals were recruited as  
219 data collectors with one supervisor. They got one day training on how to fill the check list to  
220 minimize errors. The collected data were checked by the principal investigator closely during  
221 data collection if accurate, complete & consistent. Corrective measures were taken after  
222 discussion with all the research team members and problems solved at the spot.

223 Then collected data were cleaned, coded and entered to Epi info version 7.1.4.0 and then  
224 exported to SPSS version 21 for analysis. The levels of missing values, existence of  
225 influential extreme values and multi co-linearity among independent variables was checked  
226 before analysis.

## 227 **Data processing and analysis**

228 The descriptive analysis was performed and presented in tables. Kaplan-Meier & Cox  
229 regression was applied to determine the association of independent variable with dependent.  
230 P-value of  $< 0.05$  was taken as statistically significant to identify explanatory factors of LOS  
231 in multivariable analysis.

## 232 **Model diagnostic procedures**

233 Thirty one independent variables were analyzed in the Kaplan Meier bivariate analysis, out  
234 of which twenty one were suggestive of significance (p-value  $< 0.05$ ) and entered to  
235 multivariable analysis using Cox proportional hazard regression. Stepwise forward likelihood  
236 ratio variable selection method with entry and removal probabilities of 0.05 and 0.1  
237 respectively was made on significant factors in the bivariate analysis. Accordingly, the final  
238 Cox Proportional Hazards Model was fitted on the basis of final step selected variables after  
239 model assumption diagnostic procedures. Remedial measures were taken on potential  
240 problems found in checking validity of assumptions. In due course, neither multicollinearity  
241 problem nor significant interaction was detected. However, examination of Dfbeta statistics  
242 in relation to model coefficients indicated the existence of influential extreme value. Thus,  
243 the outlier was found to be the case entry with unique SAM serial number 411 and its  
244 removal resulted in magnitudes of 0.16 and 0.26 change to the corresponding model

245 coefficients of HIV Status (Table 6 in the Annex). As a result, the final model was fitted on  
246 564 observations of selected variables.

247 The proportionality of hazards assumption was further checked by examining plots of  
248 recovery time for model variables. Patterns of the plot were not seemed to cross each other,  
249 rather were close to be parallel. This left no doubt about violation of proportionality of  
250 hazards assumption. Further this was ascertained by examination of cumulative hazard plot  
251 of the Cox-Snell residual. The plotted points nearly lie around a line that has unit slope and  
252 zero intercept, which also confirmed validity of proportional hazards assumption. Finally,  
253 goodness of the overall fit of the model was assured by Omnibus tests of model coefficients  
254 at 5% level of significance (**Figure 1**).

## 255 **Dissemination of results/findings**

Is this necessary?  
pls format  
according to  
Journal's  
publication format

256 Findings of this research was submitted and presented to Aksum University, college of health  
257 sciences for the partial fulfillment of master of public health nutrition. It will also be  
258 disseminated to both hospitals. I will make an attempt to submit it for publication in one  
259 reputable journal as well.

## 260 **Results**

261 Out of total 585 eligible severely malnourished children hospitalized to the NRUs of public  
262 hospitals in Aksum, 564 children were followed from September 11, 2016 to February 10,  
263 2019 with retrieval rate of 96.4%. Out of the total followed children, 56% were recovered  
264 from SAM and recovery times for the remaining 44% were considered to be censored at the

265 time of analysis. The recovery time analysis was made on the basis of demographics and  
266 various health related characteristics of study subjects.

### 267 **Socio-demographic characteristics, co-morbidity and type of SAM**

268 More than half (53.9%) of the children enrolled in to the study were males with the  
269 corresponding median recovery time of 15 days (95% CI: 13.7, 16.3), similar with the overall  
270 median LOS of 15 days (95% CI: 14.1, 15.9).

271 Age was grouped into categories in convenience for analysis. Median survival time was  
272 measured in days by sex and age categories of the study participants. The largest percentage  
273 of children was categorized under the age group of 12-35 months which accounted for 54.6%  
274 of the total subjects with an estimated median recovery time of 15 days in a 95% CI (13.7,  
275 16.3). In contrast, the percentage of children under age group 0-5 months were only 10.8 %,  
276 the least in percentage comparison despite its association with the highest median recovery  
277 time of 20 days with a 95% CI (16.4, 23.6).

278 The median recovery time for children with Marasmus which accounted for 64.9% of the  
279 study participants was found to be 15 days with 95% CI ( 13.8, 16.2), the same point estimate  
280 with those having Kwashiorkor (20.7 % of the total). The remaining 14.4% were children  
281 with Marasmic-Kwashiorkor having, 17 days of average length of recovery time (95% CI;  
282 13.6, 20.4) (**Table 2**).

283 At admission, pneumonia was the most commonly observed co-morbidity (38.6%) followed  
284 by anemia (16.2%) and TB (9.4%). The presence of co-morbidity contributed to the delay in  
285 recovery. It was observed that co-morbid children (64.4%) had an average LOS of 17 days  
286 with 95 % CI (15.8, 18.2). This observed difference in duration of recovery was also  
287 supported by the log rank test, and hence, co-morbidity as a potential factor was checked

288 further and found to be significant predictor of LOS. However, longer recovery time  
289 associated with Marasmic-Kwashiorkor was only due to chance that was not significantly  
290 different from duration of recovery of children with Marasmus and Kwashiorkor at 5% level  
291 of significance. Median survival time calculated in days by type of SAM and presence or  
292 absence of co-morbidity (**Table 2**).

293

### 294 **Clinical conditions of patients at admission**

295 Most of the children (98%) were newly admitted and majority of them were in severe  
296 condition at admission. Seventy one point one and fifty eight point five per cent of children  
297 come up with a complaint of diarrhea and vomiting respectively while 45.2% of them had  
298 deranged pulse rate (PR), 67.2% had dehydration (18.8%, 46.6% and 34.6% were with mild,  
299 moderate and severe dehydration respectively) and 37.4% showed up with palmar pallor.  
300 41.8% of study participants had altered consciousness level (39.5% lethargic and 2.3%  
301 comatose), 21.8 % had skin lesion while 11.5 and 14.5 percent of the children were febrile  
302 and hypothermic respectively. Among the total participants, 3.2 and 49.8% had reactive and  
303 non-reactive sero-status respectively. Among edematous children, bilateral type of edema  
304 was most common (90.5%) and grade three (+++) edema was commonly observed in 42.6%  
305 of edematous subjects whereas the remaining 41 and 16.4 per cent were grade two (++) and  
306 one (+) respectively.

307 During Bivariate analysis the presence of diarrhea, vomiting, fever, hypothermia, malaria,  
308 HIV, edema, palmar pallor, skin lesion, dehydration, and shock at admission were all  
309 suggestive of significantly related with longer duration of recovery than their absence and

310 were selected for multivariate analysis. However, the observed differences in average  
311 recovery time due to the presence of malaria and edema were not found significant according  
312 to the log rank test and hence, were not further tested for predicting recovery time in Cox  
313 regression multivariate analysis.

### 314 **Treatment, treatment outcomes, routine medications and feedings**

315 Out of the participants enrolled, 56% were discharged cured, 22.2% transferred to nearby  
316 health facility, 9.8% defaulted, 6% dead during treatment and 6% were medical referral. 18.3  
317 And 8 per cent of participants received IV fluid and blood transfusion respectively. In  
318 Bivariate analysis, not receiving both IV fluid and blood transfusion found significantly  
319 associated with shorter LOS till recovery and both were selected for multivariate analysis to  
320 check if predictors of LOS to recover from SAM.

321 Almost all (98.8%) received antibiotics like amoxicillin, ampicillin and gentamycin and  
322 higher numbers of children were supplemented folic acid and iron (68.1% and 61.9%  
323 respectively). Regarding feedings, F75 was offered for almost all patients (99.8%) followed  
324 by F100 (for 81% of participants) and half of them were given plumpy nut. Meanwhile, 31.9  
325 per cent were fed with NG tube. As receiving folic acid, vitamin A, F100, plumpy nut and  
326 not being fed with NG tube were suggestive of shorter recovery time in bivariate analysis,  
327 these all were selected for further multivariable analysis using Cox regression model (**Table**  
328 **3**). For those discharged cured, the average weight gain was 10.1g/kg/day. The overall  
329 median recovery time from SAM was also determined to be 15 days with a 95% confidence  
330 interval between 14.1 and 15.9 days (**Figure 2**).

331 **Predictors of length of stay**

332 After ascertaining validity of the model assumptions and adjustment, eight independent  
333 significant predictors of LOS for nutritional recovery were found, which are; diarrhea, HIV  
334 sero status, palmar pallor, co-morbidity, blood transfusion, IV fluid infusion, provision of  
335 plumpy nut and feeding with the help of NG tube.

336 Patients with diarrhea at admission were 42.7% (AHR = 0.573; 95% CI: 0.415-0.793) less  
337 likely to recover quickly from SAM as compared to those without diarrhea while those HIV  
338 positive found to be 60.9% (AHR = 0.391; 95% CI: 0.194-0.788) less likely to get cured fast  
339 in comparison with those whose sero-status is unknown. However, no significant difference  
340 was obtained in the hazards of non-recovery for children with Non-reactive (AHR = 0.937;  
341 95% CI: 0.714-1.231) and unknown HIV status. The difference in chance of recovery  
342 between reactive and non-reactive patients stays significant at 5% level of significance.

343 Children with palmar pallor and co-morbidity at admission were 42.5% (AHR = 0.575; 95%  
344 CI: 0.416-0.794) and 58.5% (AHR = 0.415; 95% CI: 0.302-0.570) less likely to recover  
345 earlier as compared to those who did not have such conditions while patients who were not  
346 fed with NG tube and not infused with IV fluid were 1.9 times (AHR = 1.861; 95% CI:  
347 1.335-2.593) and 1.55 times (AHR = 1.548; 95% CI: 1.074-2.232) more likely to recover fast  
348 in reference to those fed with NG tube and infused with IV fluid respectively.

349 Patients who were not treated with plumpy nut were 63.2% (AHR = 0.368; 95% CI: 0.262-  
350 0.518) less likely to recover in comparison with those who received plumpy nut.  
351 Unsurprisingly, the highest difference in median LOS was observed in patients who were not

352 transfused, 1.9 times (AHR = 1.905; 95% CI: 1.158-3.135) more likely to recover than their  
353 counter parts who were transfused.

## 354 **Discussion**

355 This research was conducted on 564 under five years of age children admitted to the NRUs  
356 of the two public hospitals in Aksum town, reviewed retrospectively from September 11,  
357 2016 to February 10, 2019 to assess LOS till recovery from SAM and associated factors.  
358 Results of this study were examined for consistency with extensive review of literatures of  
359 the title.

360 At admission, 64.4% of participants showed up with other co-morbidities on top of SAM.  
361 Though it shows less amount of children were co-morbid compared to findings from  
362 Bahirdar and Debrebrhan (1,31), it is compatible with the reports from Bahirdar, Gedeo and  
363 Jimma (32,35,37). Majority of children (64.9%) were hospitalized with marasmus (non-  
364 edematous) type of SAM, similar with some recent studies in Ethiopia (1,13,31,32,36,40–43)  
365 but in contrary to that of Jimma (37), Hadiya (44) and Uganda (30), which reported  
366 edematous type of SAM was highly encountered. This variation might be attributable to the  
367 multi-faceted causes of SAM all over the world.

368 In this enquiry, the median LOS till recovery from SAM was estimated to be 15 days (95%  
369 CI: 14.1, 15.9), which is in the acceptable range of international standards set by the  
370 SPHERE project (15). This is similar with the findings from institution based researches in  
371 Bahirdar (13,33) that reported 16 days of recovery time. But this finding is far better than the  
372 report from Sidama zone shebedino district of southern Ethiopia (41) which found LOS of 36

---



This is not the way  
a scientific  
discussion should  
be

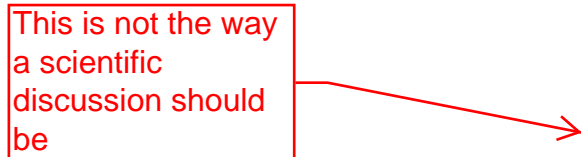

373 days. It is also better (lower LOS) than multiple studies in the country (1,8,11,35,37) and  
374 than that of Yemen (28). However, it is longer than some study reports from some parts of  
375 Ethiopia (31,32,44), Ghana (20) and India (26). This could be due to the differences in  
376 underlying co-morbidities, caring practice of healthcare providers, health facility set up and  
377 variation in socioeconomic status of the population in these different study areas. In this  
378 study, as it also was in recent studies in Ethiopia (40,42,43), type of SAM was not associated  
379 with statistically significant difference in recovery time among edematous and severely  
380 wasted children, in contrary to the current finding from southern region of Ethiopia which  
381 shows marasmic ones were less likely to recover earlier compared to their edematous counter  
382 parts (41).

383 The overall rate of recovery from SAM was found to be 56%, that is consistent with findings  
384 from Debrebrhan University that revealed 55.9% rate of recovery (31). It is better than that of  
385 Ayder hospital and other similar studies from Bahirdar (11,13,33), and far better than the  
386 findings from Ghana and Yemen (20,28). Nevertheless, it is by greater margin below the  
387 minimum international standards (15), in comparison with other study findings in Ethiopia  
388 (1,8,32,35–37,40–43) and similar reports from India, Malawi and Uganda (25,26,29,30) as  
389 well. This might be due to the relatively higher rate of transfer out to nearby health facility,  
390 which probably would be to prevent patient overload since one of the study area (AkUCSH)  
391 is the only referral hospital in this particular study area. Twenty two point two per cent of  
392 patients were transferred out to nearby health facility that is above other recently reported  
393 study findings in Ethiopia (1,13,32,33,36), Ghana (20), Uganda (30) and Yemen (28).

394 This study shows death rate of 6% from the total participants enrolled, which is acceptable by  
395 the SPHERE project minimum international standards for managing SAM in NRU/TFU, and

396 better than the recent study findings from University of Gondar (40) and Hawassa University  
397 (43) comprehensive specialized hospitals which found mortality rates of 10.8 % for each. It is  
398 similar with the findings of two studies done in Ethiopia (31,32) and one conducted in  
399 Nigeria (38). But the mortality rate is greater than that of some studies done in Ethiopia  
400 (11,13,33), India (25,26), Ghana (20) and Yemen (28). This could be due to lack of close  
401 follow up of patients with strict adherence to the national or international SAM management  
402 protocols and socioeconomic differences in the different areas.

403 The average weight gain in this thesis was in line with the international/national set of  
404 standards, unlike the recent finding from southern Ethiopia, Sidama zone, that found an  
405 average weight gain of 5.4 g/kg/day (41). This variation could be due to the study setting, as  
406 the latter was conducted in OTP (which exclude complicated SAM), that found 35.2 and  
407 20.8% of sharing and selling the home taken plumpy nut respectively.

408 According to the multivariate analysis, there was significant difference in median LOS till  
409 cured from SAM among predictor variables. Participants who showed up with palmar pallor  
410 (indicative of anemia) at admission were by 42.5 per cent (AHR = 0.575; 95% CI: 0.416-  
411 0.794) less likely to have fast recovery than those who did not have pallor. This is in line  
412 with the findings reported from Nekemte and Bahirdar felegehiwot referral hospitals (10,13).  
413 Similarly, not receiving plumpy nut (AHR = 0.368; 95% CI: 0.262-0.518) was observed as  
414 strong independent predictor of recovery time in this thesis, which also is consistent with  
415 report from Bahirdar (13). But other related studies from Ethiopia (9,32) reported that neither  
416 palmar pallor nor plumpy nut as independent predictor of LOS till recovery. This could be  
417 due to inter institutional differences in strictly adhering to the national SAM management  
418 guideline.

419 In line with this research findings, studies from different parts of the country (1,10,32) and  
420 studies from Malawi and Uganda (29,30) reported that children presented with retroviral  
421 infection at hospitalization were less likely to recover from SAM, as being reactive for HIV  
422 serostatus among the study participants had negatively affected LOS to recover from SAM  
423 (AHR = 0.391; 95% CI: 0.194-0.788) in this particular thesis work.

424 Probability of getting cured fast was reduced by 58.5% (AHR = 0.415; 95% CI: 0.302-0.570)  
425 in those admitted with co-morbidity. Consistent with this report, a hospital based  
426 retrospective cross-sectional study from Bahirdar and retrospective cohort study in similar  
427 setting in Jimma University found less recovery rate of SAM in co-morbid children (1,37).  
428 Another finding from this research is that those not fed with NG tube had 1.9 times (AHR =  
429 1.861; 95% CI: 1.335-2.593) higher chance of faster recovery in reference to those fed with  
430 NG tube, that is in agreement with study finding in Gedeo zone of southern Ethiopia (35).

### 431 **Limitations of the study**

432 Even though the strength of this thesis paper comes from its study design (cohort), it totally  
433 was based on patients' secondary data, in which incompleteness was observed to some  
434 extent, and lacked control over the quality of measurements taken during hospitalization. It  
435 was also impossible to analyze socio-economic characteristics of parents/guardians and  
436 factors related to patient treatment (medical/pharmaceutical supplies and healthcare provider  
437 expertise) that could have influenced the outcome variable in a desirable or undesirable way.

438 **Conclusion**

439 This research figured out that the median LOS till recovery is in the acceptable range of the  
440 national and international standards set to manage SAM as in patient (7,15). However, the  
441 rate of recovery was lower as compared to the stated standards and other study findings  
442 conducted in the nation.

443 It also revealed significant differences in the median LOS to recover among different  
444 predictor variables. Using multivariate Cox proportional hazard regression model, the study  
445 proved that children that showed up with presence of co-morbidity, diarrhea, palmar pallor  
446 and retroviral infection, and those who did not receive plumpy nut had lower chance of  
447 recovering early. Likewise, children who did not blood transfused, resuscitated with IV fluid  
448 and not fed with the help of NG tube had greater chance of getting cured as compared to their  
449 counter parts that were transfused, resuscitated with IV fluid and NG tube fed. Moreover, the  
450 management team of both hospitals along with zonal health office and regional health bureau  
451 are strongly expected to supervise and mentor the medical staff involved in the NRUs to  
452 assess if complying with the national SAM management protocols and fill gaps accordingly.

453 Meanwhile, staffs assigned to the nutrition rehabilitation wards are required to be vigilant  
454 enough to strictly follow the inpatient SAM management guidelines endorsed by the federal  
455 ministry of health in treating patients coming with diarrhea, pallor (anemia), HIV/AIDS, and  
456 providing plumpy nut on the proper time.

457 Finally, to enrich and compensate the limitations of this research, the scholars in Aksum  
458 University are strongly advised to conduct further study prospectively so that it can be  
459 triangulated (explore perceptions of parents/guardians about SAM and the services given).

## 460 **Declarations**

### 461 **Ethical approval**

462 Ethical clearance and permission letter were taken from the Ethical Review Committee  
463 (ERC) of Aksum University, College of health science. An official letter was written to  
464 Selekleka primary hospital requesting facilitation to conduct the research study and this  
465 official letter approved and distributed to the respective units of Selekleka primary hospital.  
466 Confidentiality and privacy was maintained during data collection, analysis and reporting in  
467 which the information obtained from the data will not be shared other than the data collectors  
468 and principal investigator and this was assured by obtaining institutional written consent  
469 from Selekleka primary hospital and by providing Information sheet which explains the  
470 purpose, benefit, and short and long-term effect of the study on the study participants.

### 471 **Consent for publication**

472 Not applicable

### 473 **Availability of data and materials**

474 The datasets used and/or analyzed during the current study are available from the  
475 corresponding author on reasonable request.

476 **Competing interests**

477 No competing interests.

478 **Funding**

479 No funding was obtained for this study

480 **Authors' contributions**

481 Conceptualization: WT

482 Data curation: WT, MA, SH, TZ

483 Formal analysis: WT, MA, SH, Tz

484 Funding acquisition: WT

485 Investigation: WT

486 Methodology: WT, MA, SH

487 Project admiration: WT

488 Resources: WT, MA, SH, TZ

489 Software: WT, MA, SH, TZ

490 Supervision: MA, SH, TZ

491 Validation: MA, SH

492 Visualization: WT, MA, SH, TZ

493 Writing original draft: TZ

494 Writing review and editing: TZ, TA, MA, KT

## 495 **Acknowledgements**

496 I am cordially thankful for the data collectors, the supervisor and staffs of St. Mary general  
497 hospital and Aksum University comprehensive specialized hospital for their support during  
498 data collection.

## 499 **References**

- 500 1. Desyibelew HD, Fekadu A, Woldie H. Recovery rate and associated factors of  
501 children age 6 to 59 months admitted with severe acute malnutrition at inpatient unit  
502 of Bahir Dar Felege Hiwot Referral hospital therapeutic feeding unite , northwest  
503 Ethiopia. 2017;18:1–12.
- 504 2. Collins S, Dent N, Binns P, Bahwere P, Sadler K, Hallam A. Review Management of  
505 severe acute malnutrition in children; 2006;
- 506 3. Williams PCM, Berkley PJA. SAM update : current WHO guidelines and WHO  
507 essential medicine list for children; 2016.
- 508 4. Medecins Sans frontieres (MSF). Nutrition guidelines, 2nd edition; May. 2006.
- 509 5. Gerensea H, Berhe T, Siyum H. Journal of Anesthesia & Clinical Trend of  
510 Malnutrition in Tigray Region from 2011/12-2014/15. 2014;8(5):8–11.
- 511 6. World health organization (WHO). Management of severe malnutrition : a manual for

- 512 physicians and other senior health workers; 1999.
- 513 7. Federal ministry of health (FMoH). Training course on the management of severe  
514 acute malnutrition, Federal democratic Republic of Ethiopia , Ministry of Health;  
515 2013;
- 516 8. Mengesha MM, Deyessa N, Sileshi B. Treatment outcome and factors affecting time  
517 to recovery in children with severe acute malnutrition treated at outpatient therapeutic  
518 care program Treatment outcome and factors affecting time to recovery in children  
519 with severe acute malnutrition treated at outpatient therapeutic care program.  
520 2016;(July).
- 521 9. Gebremichael DY. Predictors of nutritional recovery time and survival status among  
522 children with severe acute malnutrition who have been managed in therapeutic feeding  
523 centers , Southern Ethiopia : retrospective cohort study. BMC Public Health [Internet].  
524 2015;1–11. Available from: <http://dx.doi.org/10.1186/s12889-015-2593-5>
- 525 10. Mena MB, Dedefo MG. Treatment Outcome of Severe Acute Malnutrition and Its  
526 Determinants among Pediatric Patients in West Ethiopia; 2018;
- 527 11. Tirote MG, Atey TM, Mezgebe HB. Survival status and factors associated with  
528 treatment outcome of severely malnourished children admitted to Ayder referral  
529 hospital : a cross-sectional study; 2017;1–9.
- 530 12. UNICEF/WHO/World bank. Levels and trends in child malnutrition. 2018;1–16.
- 531 13. Asres DT, Prasad RPCJ, Ayele TA. Recovery time and associated factors of severe  
532 acute malnutrition among children in Bahir Dar city , Northwest Ethiopia : an



- 533 institution based retrospective cohort study; 2018;1–8.
- 534 14. Ashworth A, Schofield C. Guidelines for the inpatient treatment of severely  
535 malnourished children.
- 536 15. The Sphere project. Humanitarian charter and minimum standards in humanitarian  
537 response; 2011.
- 538 16. Trehan I, Manary MJ. Management of severe acute malnutrition in low-income and  
539 middle-income countries; 2015;283–7.
- 540 17. Gachau S, Irimu G, Ayieko P, Akech S, Agweyu A. Prevalence , outcome and quality  
541 of care among children hospitalized with severe acute malnutrition in Kenyan  
542 hospitals : A multi-site observational study; 2018;1–17.
- 543 18. Besada D, Kerber K, Leon N, Sanders D, Daviaud E, Rohde S, et al. Niger ’ s Child  
544 Survival Success , Contributing Factors and Challenges to Sustainability : A  
545 Retrospective Analysis; 2016;1–18.
- 546 19. Awoke et al. BMC Nutrition. Determinants of severe acute malnutrition among under  
547 five children in rural Enebsie. 2018;1–8.
- 548 20. Saaka M, Osman SM, Amponsem A, Ziem JB, Abdul-mumin A, Akanbong P, et al.  
549 Treatment Outcome of Severe Acute Malnutrition Cases at the Tamale Teaching  
550 Hospital; 2015;
- 551 21. UNICEF. Evaluation of community management of acute malnutrition (cmam);  
552 Ethiopia country casestudy. 2012;(September).

- 553 22. Federal Democratic Republic of Ethiopia. Ethiopian demographic health survey. 2016.
- 554 23. Tigray RHB. The Government of the National Regional State of Tigray, Bureau of  
555 Health. Trends of Key health Indicator in Tigray; 2016.
- 556 24. Aprameya HS, Kamath SP, Kini PK, Baliga BS, Shenoy U V, Jain A.  
557 Socioepidemiological determinants of severe acute malnutrition and effectiveness of  
558 nutritional rehabilitation center in its management. 2015;148–53.
- 559 25. Das S, Paul DK, Bhattacharya M, Basu S, Chatterjee A, Sen S. Clinicoepidemiological  
560 Profile , Risk Factors and Outcome of Severe Acute Malnutrition Children at the  
561 Nutritional Rehabilitation Centre of a Tertiary Care Centre in Eastern India- A 4 Years  
562 Experience. 2017;5(2):2–9.
- 563 26. Tiwari AK, Jaiswal AK, Saurabh K. A study of clinical profile and outcome of SAM  
564 children admitted in nutritional rehabilitation centre , Patna Medical College and  
565 Hospital ,. 2018;5(4):1497–504.
- 566 27. Rusmil VK, Padjadjaran U. Factors Influencing Outcomes of Children Hospitalized  
567 with Acute Severe Malnutrition Factors Influencing Outcomes of Children  
568 Hospitalized with Acute Severe Malnutrition. 2018;(October).
- 569 28. Muftah S. Outpatient management of severe acute malnutrition among children under  
570 five years old , in Yemen : a retrospective cohort study; 2016;3(2):445–51.
- 571 29. Trehan I, Goldbach HS, Lagrone LN, Meuli GJ, Wang RJ, Maleta KM, et al.  
572 Antibiotics as part of the management of severe acute malnutrition.  
573 2016;28(September).

- 574 30. Nyeko R, Calbi V, Ssegujja BO, Ayot GF. Treatment outcome among children under-  
575 five years hospitalized with severe acute malnutrition in St . Mary ’ s hospital Lacor ,  
576 Northern Uganda. BMC Nutr [Internet]. 2016;1–7. Available from:  
577 <http://dx.doi.org/10.1186/s40795-016-0058-6>
- 578 31. Derseh B, Mruts K, Demie T, Gebremariam T. Co-morbidity , treatment outcomes and  
579 factors affecting the recovery rate of under -five children with severe acute  
580 malnutrition admitted in selected hospitals from Ethiopia : retrospective follow up  
581 study. 2018;1–8.
- 582 32. Mekuria G, Derese T, Hailu G. Treatment outcome and associated factors of severe  
583 acute malnutrition among 6 – 59 months old children in Debre Markos and Finote  
584 Selam hospitals , Northwest Ethiopia : a retrospective cohort study. 2017;1–8.
- 585 33. Desalegn Gebrezgi, Degnet Teferi PPR. Recovery time from severe acute malnutrition  
586 and development of complementary food supplement for affected Ethiopian children;  
587 2019;(3):1–6.
- 588 34. Desta KS. Nutritional Disorders & Therapy Survival Status and Predictors of  
589 Mortality among Children Aged 0-59 Months with Severe Acute Malnutrition  
590 Admitted to Stabilization Center at Sekota Hospital Waghemra Zone. 2015;5(2).
- 591 35. Tadele Girum EM and AW. Comparative Analysis of the Survival Status and  
592 Treatment Outcome of Under-five Children Admitted with Severe Acute Malnutrition  
593 Among Hospital-based and Health Center Based Stabilization Abstract : 2018;209–20.
- 594 36. Kabeta A, Bekele G. Factors Associated with Treatment Outcomes of Under-five

- 595 Children with Severe Acute Malnutrition Admitted to Therapeutic Feeding Unit of  
596 Yirgalem Hospital Clinics in Mother and Child Health. 2017;14(2).
- 597 37. Jarso H, Workicho A, Alemseged F. Survival status and predictors of mortality in  
598 severely malnourished children admitted to Jimma University Specialized Hospital  
599 from 2010 to 2012 , Jimma , Ethiopia : a retrospective longitudinal study. BMC  
600 Pediatr [Internet]. 2015;1–13. Available from: [http://dx.doi.org/10.1186/s12887-015-](http://dx.doi.org/10.1186/s12887-015-0398-4)  
601 0398-4
- 602 38. John C, Diala U, Adah R, Lar L, Envuladu EA, Adedeji I, et al. Survival and  
603 nutritional status of children with severe acute malnutrition , six months post-  
604 discharge from outpatient treatment in Jigawa state , Nigeria; 2018;64:1–10.
- 605 39. Mwanza M, Okop KJ, Puoane T. Evaluation of outpatient therapeutic programme for  
606 management of severe acute malnutrition in three districts of the eastern province ,  
607 Zambia. BMC Nutr [Internet]. 2016;1–9. Available from:  
608 <http://dx.doi.org/10.1186/s40795-016-0102-6>
- 609 40. Wagnew F, Dejen G, Eshetie S, Alebel A, Worku W. Treatment cure rate and its  
610 predictors among children with severe acute malnutrition in northwest Ethiopia : A  
611 retrospective record review. 2019;288:1–13.
- 612 41. Teshome G, Bosha T, Gebremedhin S. Time-to-recovery from severe acute  
613 malnutrition in children 6 – 59 months of age enrolled in the outpatient treatment  
614 program in Shebedino , Southern Ethiopia : a prospective cohort study. 2019;1–10.
- 615 42. Hassen SL, Astatkie A, Mekonnen TC, Bogale GG. Survival Status and Its

616 Determinants among Under-Five Children with Severe Acute Malnutrition Admitted  
617 to Inpatient Therapeutic Feeding Centers in South Wollo Zone , Amhara Region ,  
618 Ethiopia. 2019;

619 43. Fikrie A, Alemayehu A, Gebremedhin S. Treatment outcomes and factors affecting  
620 time-to-recovery from severe acute malnutrition in 6 – 59 months old children  
621 admitted to a stabilization center in Southern Ethiopia : A retrospective cohort study.  
622 2019;1–9.

623 44. Yohannes T, Laelago T, Ayele M, Tamrat T. Mortality and morbidity trends and  
624 predictors of mortality in under-five children with severe acute malnutrition in Hadiya  
625 zone , South Ethiopia : a four-year retrospective review of hospital-based. 2017;1–8.

626



**Table 1: Sample size calculation**

| Study                                  | P             | AHR                         | Margin of error ( $\alpha$ ) | Power of study | Rate of incompleteness | Sample size |
|----------------------------------------|---------------|-----------------------------|------------------------------|----------------|------------------------|-------------|
| Jimma University (Jarso et al. 2015)   | 22.2% (0.222) | 1.9 (age < 24 Months)       | 0.05                         | 80%            | 10%                    | 378         |
|                                        |               | 3.0(Hypothermia presence)   | 0.05                         | 80%            | 10%                    | 130         |
|                                        |               | 2.6(impaired consciousness) | 0.05                         | 80%            | 10%                    | 171         |
| Wolkite University (Girum et al. 2018) | 17.1% (0.171) | 2.44 (altered pulse rate)   | 0.05                         | 80%            | 10%                    | 254         |
|                                        |               | 1.8 (NG tube insertion)     | 0.05                         | 80%            | 10%                    | 585         |
|                                        |               | 2.78 (Hypoglycemia present) | 0.05                         | 80%            | 10%                    | 194         |

Where P = Prevalence of non-recovery (at third week)

**Table 1: Log Rank (Mantel-Cox) test of equality of survival distribution for socio-demographic characteristics, type of SAM and co-morbidity at admission in severely malnourished children admitted to public hospitals in Aksum, 2019**

| Variable            | Category          | Percentage of outcome category |        |             |               |            |         | Median Survival (days) | 95% CI |      | Log-rank test |         |
|---------------------|-------------------|--------------------------------|--------|-------------|---------------|------------|---------|------------------------|--------|------|---------------|---------|
|                     |                   | Cured %                        | Dead % | Defaulted % | Transferred % | Referred % | Total % |                        | LL     | UL   | Chi-square    | P-value |
| Sex                 | Male              | 31.4                           | 2.3    | 4.8         | 12.2          | 3.2        | 53.9    | 15                     | 13.7   | 16.3 | 2.87          | 0.090   |
|                     | Female            | 24.6                           | 3.7    | 5.0         | 9.9           | 2.8        | 46.1    | 16                     | 14.6   | 17.4 |               |         |
| Age (in months)     | 0-5               | 7.3                            | 1.1    | 0.7         | 1.1           | 0.7        | 10.8    | 20                     | 16.4   | 23.6 | 8.74          | 0.033   |
|                     | 6-11              | 10.1                           | 0.5    | 2.1         | 5.5           | 1.6        | 19.9    | 14                     | 13.2   | 14.8 |               |         |
|                     | 12-35             | 29.8                           | 3.4    | 5.5         | 12.9          | 3.0        | 54.6    | 15                     | 13.7   | 16.3 |               |         |
|                     | 36-59             | 8.9                            | 1.1    | 1.4         | 2.7           | 0.7        | 14.7    | 15                     | 13.1   | 16.9 |               |         |
| Name of institution | AkUCSH            | 23.2                           | 2.3    | 4.6         | 6.0           | 3.9        | 40.1    | 16                     | 14.1   | 17.9 | 7.34          | 0.007   |
|                     | St. Mary hospital | 32.8                           | 3.7    | 5.1         | 16.1          | 2.1        | 59.9    | 15                     | 13.9   | 16.1 |               |         |
| Type of SAM         | Marasmus          | 35.5                           | 3.5    | 6.9         | 14.9          | 4.1        | 64.9    | 15                     | 13.8   | 16.2 | 0.384         | 0.825   |
|                     | Kwashiorkor       | 11.2                           | 1.1    | 2.0         | 5.1           | 1.4        | 20.7    | 15                     | 13.1   | 16.9 |               |         |
|                     | Marasmic-kwashi   | 9.4                            | 1.4    | 0.9         | 2.1           | 0.5        | 14.4    | 17                     | 13.6   | 20.4 |               |         |
| Co-morbidity        | Present           | 38.8                           | 6.0    | 5.0         | 8.7           | 5.9        | 64.4    | 17                     | 15.8   | 18.2 | 82.82         | <0.001  |
|                     | Absent            | 17.2                           | 0.0    | 4.8         | 13.5          | 0.2        | 35.6    | 11                     | 10.0   | 12.0 |               |         |
| Total               |                   | 56.0                           | 6.0    | 9.8         | 22.2          | 6.0        | 100.0   | 15                     | 14.1   | 15.9 |               |         |



**Table 1: Log Rank (Mantel-Cox) test of equality of survival distribution for clinical conditions at admission, treatment and routine medications in severely malnourished children admitted to public hospitals, Aksum, 2019**

| Variable            | Category     | Percentage of outcome category |        |             |               |            |         | Median survival (days) | 95% CI |      | Log rank test |         |
|---------------------|--------------|--------------------------------|--------|-------------|---------------|------------|---------|------------------------|--------|------|---------------|---------|
|                     |              | Cured %                        | Dead % | Defaulted % | Transferred % | Referred % | Total % |                        | LL     | UL   | Chi-square    | P-value |
| Diarrhea            | Present      | 41.7                           | 5.7    | 6.7         | 12.9          | 4.1        | 71.1    | 16                     | 14.7   | 17.3 | 28.74         | <0.001  |
|                     | Absent       | 14.4                           | 0.4    | 3.1         | 9.2           | 2.0        | 28.9    | 13                     | 11.5   | 14.5 |               |         |
| Vomiting            | Present      | 33.5                           | 5.1    | 5.2         | 11            | 3.7        | 58.5    | 17                     | 15.6   | 18.4 | 13.38         | <0.001  |
|                     | Absent       | 22.5                           | 0.9    | 4.6         | 11.2          | 2.3        | 41.5    | 14                     | 13.1   | 14.9 |               |         |
| Fever               | Present      | 5.7                            | 2.0    | 0.7         | 1.3           | 2.0        | 11.5    | 19                     | 15.6   | 22.4 | 5.41          | 0.02    |
|                     | Absent       | 50.4                           | 4.0    | 9.1         | 20.9          | 4.0        | 88.5    | 15                     | 14.0   | 16.0 |               |         |
| Hypothermia         | Present      | 7.6                            | 3.0    | 1.2         | 1.6           | 1.0        | 14.5    | 21                     | 15.6   | 26.4 | 17.46         | <0.001  |
|                     | Absent       | 48.4                           | 3.0    | 8.6         | 20.6          | 5.0        | 85.5    | 15                     | 14.1   | 15.9 |               |         |
| Malaria             | Present      | 2.1                            | 0.0    | 0.0         | 0.2           | 0.0        | 2.3     | 16                     | 14.4   | 17.6 | 0.78          | 0.377   |
|                     | Absent       | 53.9                           | 6.0    | 9.8         | 22.0          | 6.0        | 97.7    | 15                     | 14.0   | 16.0 |               |         |
| HIV status          | Reactive     | 2.3                            | 0.9    | 0.0         | 0.0           | 0.0        | 3.2     | 28                     | 19.4   | 36.6 | 14.20         | 0.001   |
|                     | Non-reactive | 30.9                           | 3.4    | 3.4         | 8.7           | 3.5        | 49.8    | 15                     | 13.5   | 16.5 |               |         |
|                     | Unknown      | 22.9                           | 1.8    | 6.4         | 13.5          | 2.5        | 47.0    | 15                     | 13.9   | 16.1 |               |         |
| Pulse rate          | Bradycardic  | 0.5                            | 0.4    | 0.0         | 0.0           | 0.4        | 1.3     | 13                     | 5.0    | 21.0 | 27.56         | <0.001  |
|                     | Normal       | 30.0                           | 0.6    | 6.5         | 13.8          | 2.8        | 53.8    | 14                     | 12.9   | 15.1 |               |         |
|                     | Tachycardic  | 25.5                           | 5.1    | 3.3         | 8.4           | 2.8        | 44.9    | 18                     | 16     | 20.0 |               |         |
| Consciousness level | Conscious    | 33.0                           | 0.4    | 6.6         | 16.5          | 1.8        | 58.2    |                        |        |      | 42.597        | <0.001  |
|                     | Lethargic    | 23.0                           | 3.9    | 3.0         | 5.5           | 4.0        | 39.5    |                        |        |      |               |         |
|                     | Comatose     | 0.0                            | 1.8    | 0.2         | 0.2           | 0.2        | 2.3     |                        |        |      |               |         |
| Edema               | Present      | 21.1                           | 2.5    | 2.9         | 7.3           | 1.8        | 35.5    | 16                     | 14.5   | 17.5 | 0.05          | 0.827   |
|                     | Absent       | 34.9                           | 3.5    | 6.9         | 14.9          | 4.2        | 64.5    | 15                     | 13.8   | 16.2 |               |         |
| Palmar pallor       | Present      | 21.6                           | 4.6    | 2.4         | 5.0           | 3.9        | 37.4    | 19                     | 17.4   | 20.6 | 39.60         | <0.001  |
|                     | Absent       | 34.4                           | 1.4    | 7.4         | 17.2          | 2.1        | 62.6    | 14                     | 13.2   | 14.8 |               |         |
| Skin lesion         | Present      | 14.5                           | 2.8    | 0.6         | 2.5           | 1.4        | 21.8    | 20                     | 16.4   | 23.6 | 22.04         | <0.001  |
|                     | Absent       | 41.5                           | 3.2    | 9.2         | 19.7          | 4.6        | 78.2    | 14                     | 13.1   | 14.9 |               |         |
| Dehydration         | Present      | 41                             | 6.0    | 6.7         | 9.3           | 4.3        | 67.2    | 16                     | 14.7   | 17.3 | 35.90         | <0.001  |
|                     | Absent       | 15                             | 0.0    | 3.1         | 12.9          | 1.8        | 32.8    | 12                     | 10.7   | 13.3 |               |         |

**Table 3:** Survival distributions for clinical conditions at admission, treatment and routine medications, Aksum, 2019 (Continued)

| Variable                   | Category | Percentage of outcome category |        |             |               |            |         | Median survival (days) | 95% CI |      | Log rank test |         |
|----------------------------|----------|--------------------------------|--------|-------------|---------------|------------|---------|------------------------|--------|------|---------------|---------|
|                            |          | Cured %                        | Dead % | Defaulted % | Transferred % | Referred % | Total % |                        | LL     | UL   | Chi-square    | P-value |
| Shock                      | No       | 55.0                           | 4.0    | 9.6         | 22.0          | 5.7        | 96.3    | 15                     | 14.1   | 16.0 | 16.87         | <0.001  |
|                            | Yes      | 1.0                            | 2.0    | 0.2         | 0.2           | 0.4        | 3.7     | 33                     | 21.3   | 44.7 |               |         |
| Transfusion                | No       | 51.8                           | 3.2    | 9.8         | 22.2          | 5.1        | 92.0    | 14                     | 13.1   | 14.9 | 25.92         | <0.001  |
|                            | Yes      | 4.2                            | 2.8    | 0.0         | 0.0           | 0.9        | 8.0     | 27                     | 18.9   | 35.1 |               |         |
| IV infusion                | No       | 43.6                           | 3.2    | 9.4         | 20.2          | 5.3        | 81.7    | 14                     | 13.4   | 14.7 | 24.69         | <0.001  |
|                            | Yes      | 12.4                           | 2.8    | 0.4         | 2.0           | 0.7        | 18.3    | 20                     | 18.5   | 21.5 |               |         |
| Amox/ampicillin/gentamycin | No       | 0.5                            | 0.2    | 0.2         | 0.4           | 0.0        | 1.2     | 12                     | 4.7    | 19.3 | 2.07          | 0.150   |
|                            | Yes      | 55.5                           | 5.8    | 9.6         | 21.8          | 6.0        | 98.8    | 15                     | 14.1   | 15.9 |               |         |
| Anti malaria treatment     | No       | 54.0                           | 5.7    | 9.8         | 22.0          | 6.0        | 97.5    | 15                     | 14     | 16   | 0.72          | 0.395   |
|                            | Yes      | 2.0                            | 0.4    | 0.0         | 0.2           | 0.0        | 2.5     | 15                     | 12.9   | 17.1 |               |         |
| Deworming                  | No       | 29.6                           | 4.6    | 8.7         | 13.7          | 5.3        | 61.9    | 16                     | 14.8   | 17.2 | 0.04          | 0.852   |
|                            | Yes      | 26.4                           | 1.4    | 1.1         | 8.5           | 0.7        | 38.1    | 15                     | 13.5   | 16.6 |               |         |
| Measles vaccinated         | No       | 38.5                           | 5.8    | 8.5         | 16.2          | 6.0        | 75.1    | 15                     | 14     | 16.1 | 0.47          | 0.492   |
|                            | Yes      | 17.5                           | 0.2    | 1.3         | 6.0           | 0.0        | 24.9    | 15                     | 13.1   | 16.9 |               |         |
| Folic acid                 | No       | 12.2                           | 3.4    | 6.1         | 8.2           | 2.1        | 31.9    | 17                     | 15.7   | 18.3 | 7.35          | 0.007   |
|                            | Yes      | 43.8                           | 2.7    | 3.7         | 14            | 3.9        | 68.1    | 14                     | 12.9   | 15.1 |               |         |
| Vitamin A                  | No       | 13.5                           | 4.6    | 6.1         | 5.5           | 3.4        | 33      | 18                     | 16.1   | 19.9 | 12.93         | <0.001  |
|                            | Yes      | 42.5                           | 1.4    | 3.7         | 16.7          | 2.6        | 67      | 14                     | 13.1   | 14.9 |               |         |
| Iron                       | No       | 14.9                           | 4.3    | 7.4         | 9.8           | 1.8        | 38.1    | 15                     | 13.1   | 16.9 | 1.08          | 0.300   |
|                            | Yes      | 41.1                           | 1.7    | 2.4         | 12.4          | 4.2        | 61.9    | 15                     | 13.9   | 16.1 |               |         |
| F-75                       | No       | 0.0                            | 0.0    | 0.0         | 0.0           | 0.2        | 0.2     |                        |        |      | 0.04          | 0.845   |
|                            | Yes      | 56.0                           | 6.0    | 9.8         | 22.2          | 5.8        | 99.8    |                        |        |      |               |         |
| F-100                      | No       | 4.3                            | 3.2    | 5.1         | 3.2           | 3.2        | 19.0    | 20                     | 14.2   | 25.8 | 5.89          | 0.015   |
|                            | Yes      | 51.7                           | 2.8    | 4.7         | 19.0          | 2.8        | 81.0    | 15                     | 14.1   | 16   |               |         |
| Plumpy nut                 | No       | 9.9                            | 6.0    | 9.8         | 18.8          | 5.5        | 50.0    | 21                     | 17.1   | 24.9 | 55.44         | <0.001  |
|                            | Yes      | 46.1                           | 0.0    | 0.0         | 3.4           | 0.5        | 50.0    | 14                     | 13.3   | 14.7 |               |         |
| NG Tube feeding            | No       | 36.3                           | 0.4    | 9.1         | 20.1          | 2.3        | 68.1    | 13                     | 12.3   | 13.7 | 102.2         | <0.001  |
|                            | Yes      | 19.7                           | 5.6    | 0.7         | 2.1           | 3.7        | 31.9    | 21                     | 18.5   | 23.5 |               |         |
| Total                      |          | 56.0                           | 6.0    | 9.8         | 22.2          | 6.0        | 100     | 15                     | 14.1   | 15.9 |               |         |

**Table 1: Factors associated with LOS to recover from SAM in children admitted to public hospitals in Aksum, 2019**

| Variable            | Category          | Recovery status |         |           |         | CHR (95% CI)        | P-value  | AHR (95% CI)        |
|---------------------|-------------------|-----------------|---------|-----------|---------|---------------------|----------|---------------------|
|                     |                   | Non-recovered   |         | Recovered |         |                     |          |                     |
|                     |                   | Number          | Percent | Number    | Percent |                     |          |                     |
| Sex                 | Male              | 127             | 22.5    | 177       | 31.4    | 1.204(0.963, 1.505) | 0.104    |                     |
|                     | Female            | 121             | 21.5    | 139       | 24.6    | 1                   |          |                     |
| Age                 | 0-5               | 20              | 3.5     | 41        | 7.3     | 0.639(0.421, 0.969) | 0.048*   | 0.702(0.369, 1.334) |
|                     | 6-11              | 55              | 9.8     | 57        | 10.1    | 1.105(0.755, 1.616) |          | 1.102(0.711, 1.706) |
|                     | 12-35             | 140             | 24.8    | 168       | 29.8    | 0.982(0.715, 1.348) |          | 1.012(0.717, 1.428) |
|                     | 36-59             | 33              | 5.9     | 50        | 8.9     | 1                   |          | 1                   |
| Name of institution | AkUCSH            | 95              | 16.8    | 131       | 23.2    | 1.354(1.077, 1.702) | 0.01*    | 0.775(0.573, 1.048) |
|                     | St. Mary hospital | 153             | 27.1    | 185       | 32.8    | 1                   |          | 1                   |
| Type of SAM         | Marasmus          | 166             | 29.4    | 200       | 35.5    | 0.974(0.844, 1.124) | 0.717    |                     |
|                     | Kwash             | 54              | 9.6     | 63        | 11.2    |                     |          |                     |
|                     | Mixed             | 28              | 5.0     | 53        | 9.4     | 1                   |          |                     |
| Co-morbidity        | Present           | 144             | 25.5    | 219       | 38.8    | 3.103(2.384, 4.039) | <0.001** | 0.415(0.302, 0.570) |
|                     | Absent            | 104             | 18.4    | 97        | 17.2    | 1                   |          | 1                   |
| Diarrhea            | Present           | 166             | 29.4    | 235       | 41.7    | 1.973(1.518, 2.565) | <0.001** | 0.573(0.415, 0.793) |
|                     | Absent            | 82              | 14.5    | 81        | 14.4    | 1                   |          | 1                   |
| Vomiting            | Present           | 141             | 25.0    | 189       | 33.5    | 1.509(1.198, 1.901) | <0.001*  | 0.883(0.684, 1.138) |
|                     | Absent            | 107             | 19.0    | 127       | 22.5    | 1                   |          | 1                   |
| Fever               | Present           | 33              | 5.9     | 32        | 5.7     | 1.515(1.049, 2.187) | 0.027*   | 1.066(0.695, 1.637) |
|                     | Absent            | 215             | 38.1    | 284       | 50.4    | 1                   |          | 1                   |
| Hypothermia         | Present           | 39              | 6.9     | 43        | 7.6     | 1.929(1.391, 2.674) | <0.001*  | 0.767(0.529, 1.112) |
|                     | Absent            | 209             | 37.1    | 273       | 48.4    | 1                   |          | 1                   |
| Malaria             | Present           | 1               | 0.2     | 12        | 2.1     | 0.779(0.436, 1.390) | 0.398    |                     |
|                     | Absent            | 247             | 43.8    | 304       | 53.9    | 1                   |          |                     |
| HIV status          | Reactive          | 5               | 0.9     | 13        | 2.3     | 1.314(1.091, 1.583) | 0.004**  | 0.391(0.194, 0.788) |
|                     | Non-reactive      | 107             | 19.0    | 174       | 30.9    |                     |          | 0.937(0.714, 1.231) |
|                     | Unknown           | 136             | 24.1    | 129       | 22.9    | 1                   |          | 1                   |

**Table 4:** Factors associated with LOS to recover from SAM, public hospitals in Aksum, 2019 (Continued)

| Variable                    | Category    | Recovery status |         |           |         | CHR (95% CI)        | P-value  | AHR (95% CI)        |
|-----------------------------|-------------|-----------------|---------|-----------|---------|---------------------|----------|---------------------|
|                             |             | Non-recovered   |         | Recovered |         |                     |          |                     |
|                             |             | Number          | Percent | Number    | Percent |                     |          |                     |
| Pulse rate                  | Bradycardic | 4               | 0.8     | 3         | 0.6     | 0.559(0.445, 0.702) | <0.001*  | 2.227(0.676, 7.336) |
|                             | Normal      | 124             | 23.5    | 160       | 30.3    |                     |          | 1.363(1.054, 1.762) |
|                             | Tachycardic | 101             | 19.1    | 136       | 25.8    |                     |          | 1                   |
| Consciousness level         | Conscious   | 142             | 25.2    | 186       | 33.0    | 0.492(0.393, 0.616) | <0.001*  | 14.29(0.00, 93.70)  |
|                             | Lethargic   | 93              | 16.5    | 130       | 23.0    |                     |          | 11.53(0.00, 75.59)  |
|                             | Comatose    | 13              | 2.3     | 0         | 0.0     |                     |          | 1                   |
| Edema                       | Present     | 81              | 14.4    | 119       | 21.1    | 1.025(0.816, 1.287) | 0.834    |                     |
|                             | Absent      | 167             | 29.6    | 197       | 34.9    |                     |          | 1                   |
| Palmar pallor               | Present     | 89              | 15.8    | 122       | 21.6    | 2.036(1.610, 2.574) | <0.001** | 0.575(0.416, 0.794) |
|                             | Absent      | 159             | 28.2    | 194       | 34.4    |                     |          | 1                   |
| Skin lesion                 | Present     | 41              | 7.3     | 82        | 14.5    | 1.80(1.389, 2.332)  | <0.001*  | 0.982(0.697, 1.384) |
|                             | Absent      | 207             | 36.7    | 234       | 41.5    |                     |          | 1                   |
| Dehydration                 | Present     | 148             | 26.2    | 231       | 41      | 2.143(1.645, 2.791) | <0.001*  | 1.107(0.802, 1.528) |
|                             | Absent      | 100             | 17.7    | 85        | 15.1    |                     |          | 1                   |
| Shock                       | No          | 233             | 41.3    | 310       | 55      | 0.196(0.080, 0.481) | <0.001*  | 1.481(0.584, 3.755) |
|                             | Yes         | 15              | 2.7     | 6         | 1.1     |                     |          | 1                   |
| Transfusion                 | No          | 227             | 40.2    | 292       | 51.8    | 0.364(0.239, 0.555) | <0.001** | 1.905(1.158, 3.135) |
|                             | Yes         | 21              | 3.7     | 24        | 4.3     |                     |          | 1                   |
| IV infusion                 | No          | 215             | 38.1    | 246       | 43.6    | 0.521(0.397, 0.684) | <0.001** | 1.548(1.074, 2.232) |
|                             | Yes         | 33              | 5.9     | 70        | 12.4    |                     |          | 1                   |
| Amox/ampicil lin/gentamycin | No          | 4               | 0.7     | 3         | 0.5     | 0.452(0.144, 1.417) | 0.173    |                     |
|                             | Yes         | 244             | 43.3    | 313       | 55.5    |                     |          | 1                   |
| Anti malaria treatment      | No          | 245             | 43.5    | 305       | 54.0    | 1.285(0.703, 2.351) | 0.415    |                     |
|                             | Yes         | 3               | 0.5     | 11        | 2.0     |                     |          | 1                   |
| Deworming                   | No          | 182             | 32.3    | 167       | 29.6    | 1.021(0.817, 1.274) | 0.857    |                     |
|                             | Yes         | 66              | 11.7    | 149       | 26.4    |                     |          | 1                   |
| Measles vaccinated          | No          | 206             | 36.6    | 217       | 38.5    | 1.084(0.853, 1.377) | 0.510    |                     |
|                             | Yes         | 41              | 7.3     | 99        | 17.6    |                     |          | 1                   |

**Table 4:** Factors associated with LOS to recover from SAM, public hospitals in Aksum, 2019 (Continued)

| Variable        | Category | Recovery status |         |           |         | CHR (95% CI)        | P-value  | AHR (95% CI)        |
|-----------------|----------|-----------------|---------|-----------|---------|---------------------|----------|---------------------|
|                 |          | Non-recovered   |         | Recovered |         |                     |          |                     |
|                 |          | Number          | Percent | Number    | Percent |                     |          |                     |
| Folic acid      | No       | 111             | 19.7    | 69        | 12.2    | 1.427(1.090, 1.868) | 0.010*   | 1.003(0.670, 1.502) |
|                 | Yes      | 137             | 24.3    | 247       | 43.8    | 1                   |          | 1                   |
| Vitamin A       | No       | 110             | 19.5    | 76        | 13.5    | 1.575(1.214, 2.043) | 0.001*   | 0.881(0.635, 1.223) |
|                 | Yes      | 138             | 24.5    | 240       | 42.6    | 1                   |          | 1                   |
| Iron            | No       | 131             | 23.2    | 84        | 14.9    | 1.136(0.884, 1.459) | 0.319    |                     |
|                 | Yes      | 117             | 20.8    | 232       | 41.1    | 1                   |          |                     |
| F-75            | No       | 1               | 0.2     | 0         | 0.0     | 20.149(0.000, 101)  | 0.897    |                     |
|                 | Yes      | 247             | 43.8    | 316       | 56.0    | 1                   |          |                     |
| F-100           | No       | 83              | 14.7    | 24        | 4.3     | 1.639(1.077, 2.493) | 0.021*   | 1.284(0.779, 2.117) |
|                 | Yes      | 165             | 29.3    | 292       | 51.7    | 1                   |          | 1                   |
| Plumpy nut      | No       | 226             | 40.1    | 56        | 9.9     | 2.774(2.073, 3.711) | <0.001** | 0.368(0.262, 0.518) |
|                 | Yes      | 22              | 3.9     | 260       | 46.1    | 1                   |          | 1                   |
| NG Tube feeding | No       | 179             | 31.7    | 205       | 36.3    | 0.287(0.221, 0.374) | <0.001** | 1.861(1.335, 2.593) |
|                 | Yes      | 69              | 12.2    | 111       | 19.7    | 1                   |          | 1                   |
| Total           |          | 248             | 44.0    | 316       | 56.0    |                     |          |                     |

**NB:** \* = significant during bivariate analysis and selected for multivariate Cox regression, \*\* = significant predictors of length of stay (LOS)



**Table 1: Performance indicators of TFUs in public hospitals, Aksum, 2019**

| Indicators              | Achieved      | SPHERE project reference values |                |
|-------------------------|---------------|---------------------------------|----------------|
|                         |               | Acceptable                      | Alarming       |
| Recovery rate           | 56.0 %        | > 75 %                          | < 50 %         |
| Death rate              | 6.0 %         | < 10 %                          | > 15 %         |
| Defaulter               | 9.8 %         | < 15 %                          | > 25 %         |
| LOS in days             | 15 days       | < 28 days                       | > 42 days      |
| Weight gain in g/kg/day | 10.1 g/kg/day | > = 8 g/kg/day                  | < = 5 g/kg/day |

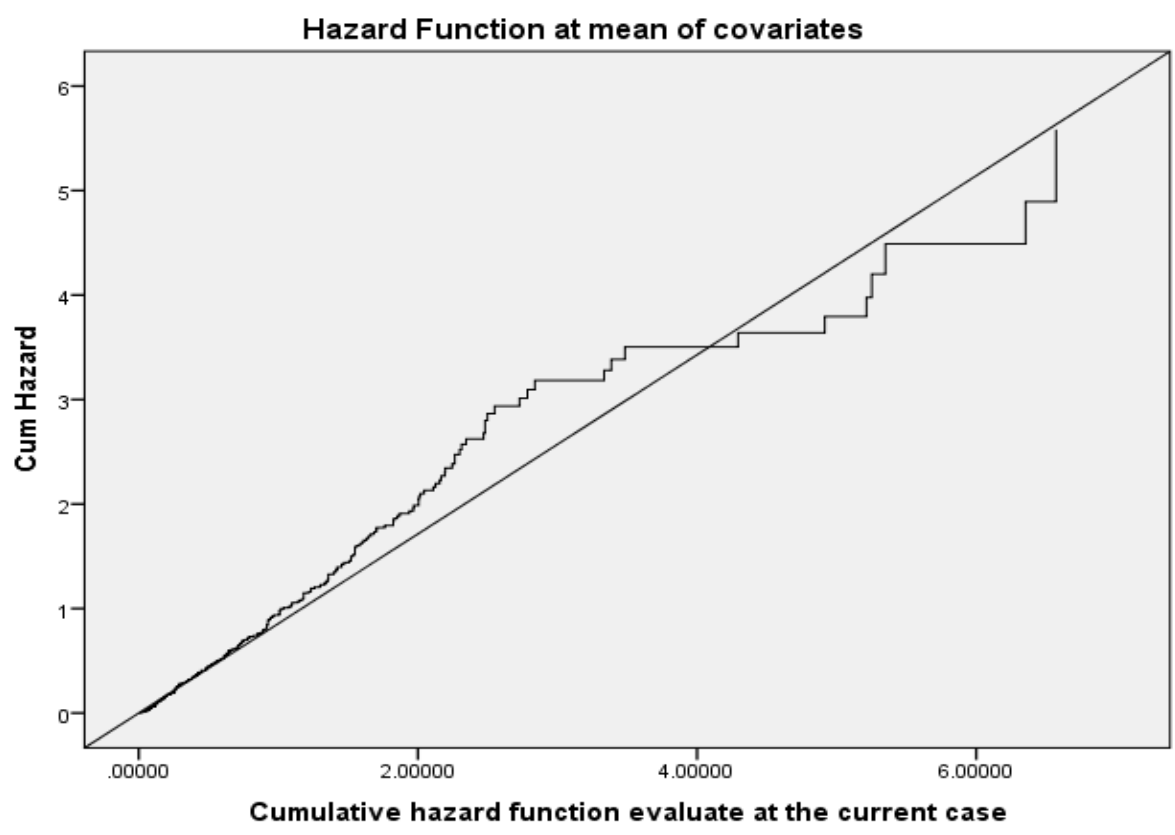

Figure 1: Cumulative hazard plots of Cox Snell Residual



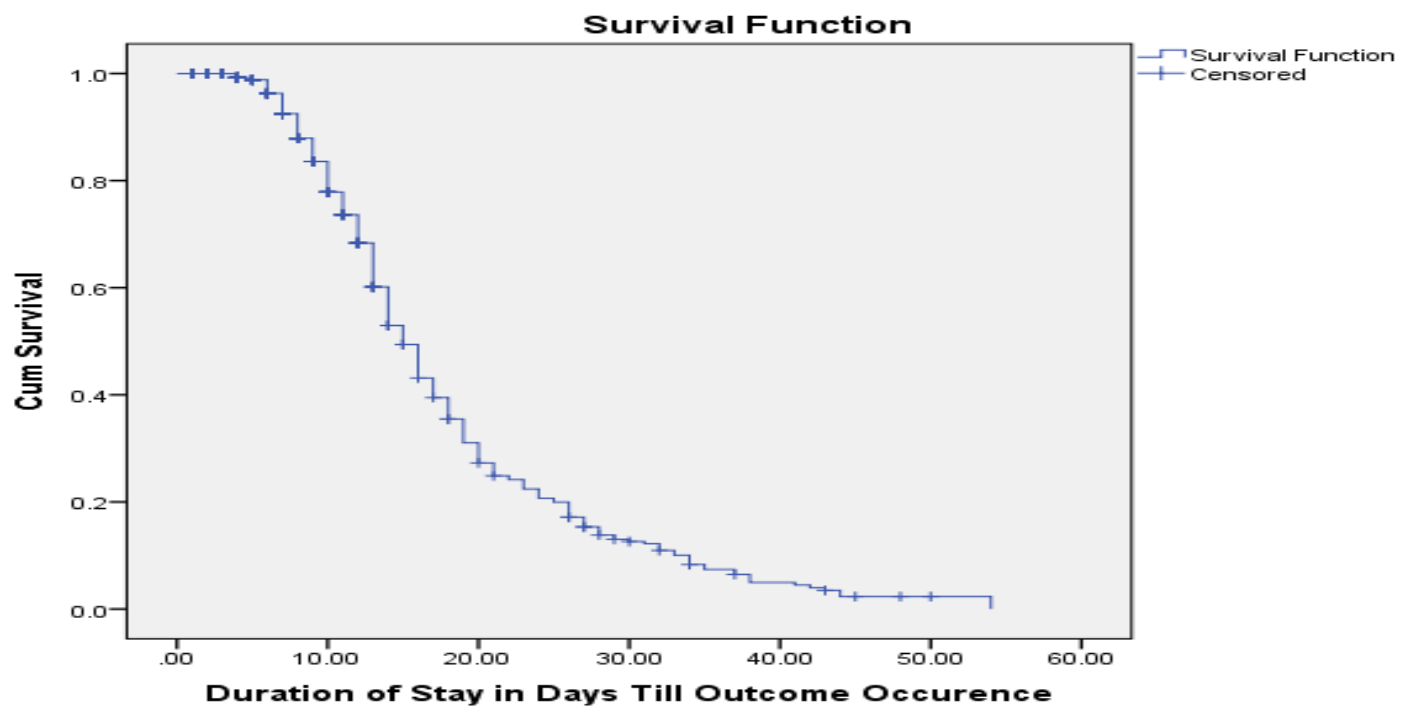

Figure 2: Overall survival function of children with SAM admitted to public hospitals in Aksum, 2019

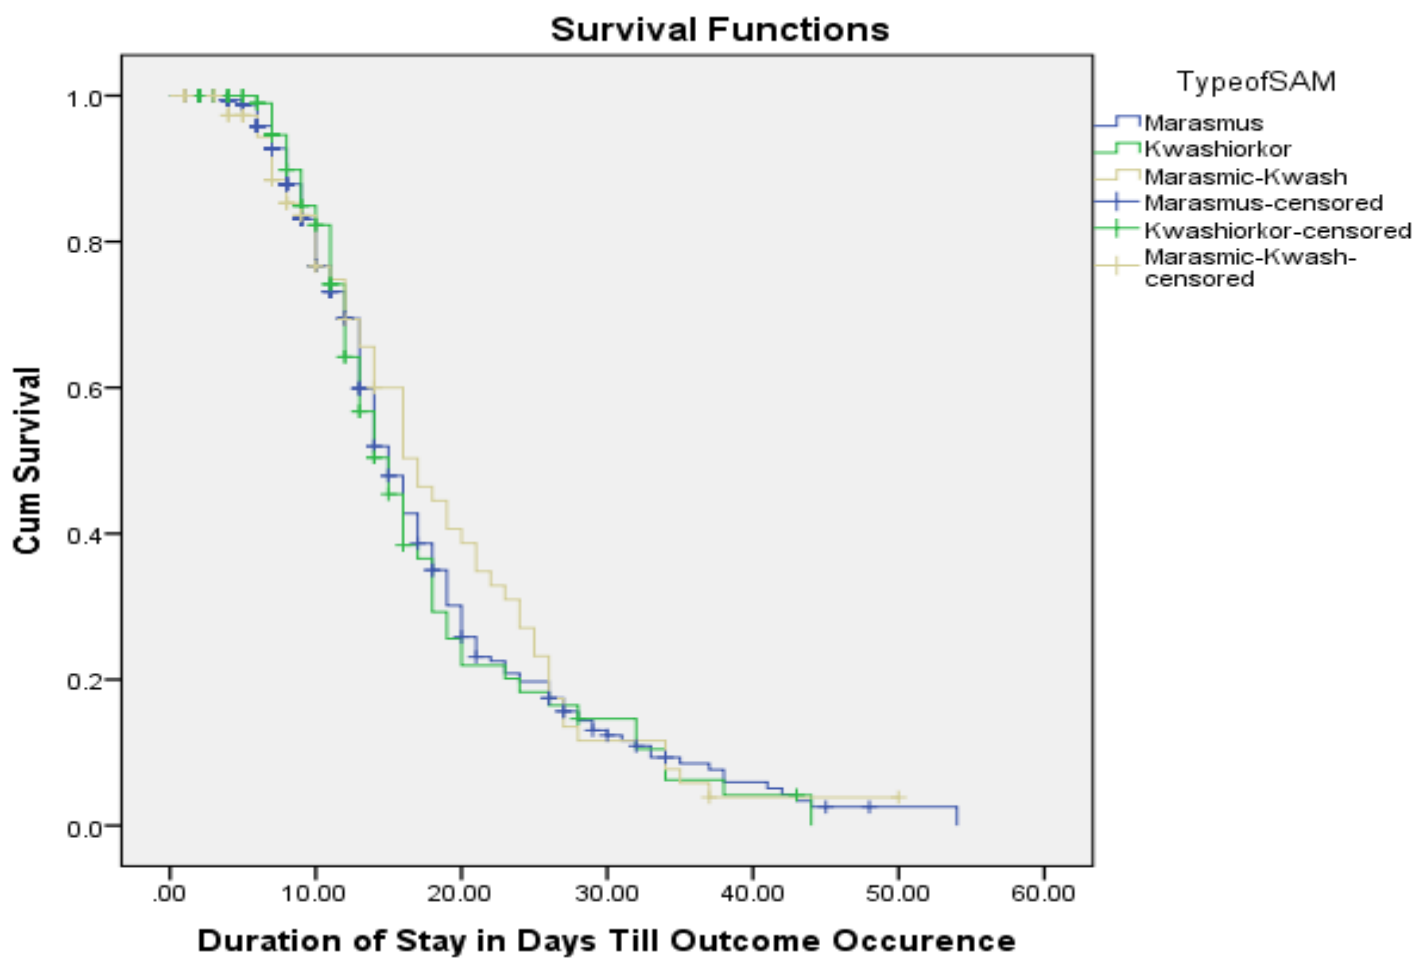

Figure 3: Survival function by type of SAM, Aksum, 2019
